# Supplementary material for: In silico method for inferring genotypes in pedigrees
Source: Springer Nature journal article supplement (doi:10.1038/ng1863), 2006-08-20
Supplement: 41588_2006_BFng1863_MOESM1_ESM.pdf [file 41588_2006_BFng1863_MOESM1_ESM.pdf]

## In Silico Genotyping: Determining Genotypes in Pedigrees by Inference

Joshua T. Burdick, Weimin Chen, Gonçalo R. Abecasis, Vivian G. Cheung

Supplementary Table 1. Detailed Comparisons of Simulated Data

| Family Structures and<br>Individuals Genotyped at Candidate SNP | Missing Genotypes |               |               | Power                         |                       |                       |                  | Relative Efficiency versus*... |                          |
|-----------------------------------------------------------------|-------------------|---------------|---------------|-------------------------------|-----------------------|-----------------------|------------------|--------------------------------|--------------------------|
|                                                                 | % of<br>Total     | %<br>Inferred | Error<br>Rate | Simulated<br>H <sup>2</sup> * | Observed<br>Genotypes | Inferred<br>Genotypes | All<br>Genotypes | Alternative<br>Design A*       | Alternative<br>Design B* |
| <b>CEPH Pedigrees In Table 1 of main manuscript</b>             | 46.4              | 82.4          | 0.4           | 0.5                           | 0.0                   | 83.9                  | 97.1             | NA                             | NA                       |
| <b>10 3-generation pedigrees with 8 offspring each</b>          |                   |               |               |                               |                       |                       |                  |                                |                          |
| ... grandparents and parents genotyped                          | 57.1              | 82.4          | 0.4           | 0.5                           | 0.0                   | 74.1                  | 92.2             | NA                             | NA                       |
| ... grandparents, parents and one child genotyped               | 50.0              | 99.2          | 0.7           | 0.5                           | 0.0                   | 91.2                  | 92.2             | NA                             | NA                       |
| <b>100 3-generation pedigrees with 8 offspring each</b>         |                   |               |               |                               |                       |                       |                  |                                |                          |
| ... grandparents and parents genotyped                          | 57.1              | 82.4          | 0.4           | 0.05                          | 0.3                   | 44.3                  | 82.2             | 5.13                           | 1.78                     |
| ... grandparents, parents and one child genotyped               | 50.0              | 99.2          | 0.7           | 0.05                          | 1.3                   | 70.8                  | 82.2             | 3.87                           | 1.93                     |
| <b>500 nuclear families with 3 offspring each</b>               |                   |               |               |                               |                       |                       |                  |                                |                          |
| ... parents and one child genotyped                             | 40.0              | 94.6          | 1.1           | 0.05                          | 4.7                   | 62.1                  | 82.7             | 2.40                           | 1.37                     |
| ... parents and two children genotyped                          | 20.0              | 96.9          | 0.6           | 0.05                          | 40.8                  | 77.4                  | 82.7             | 1.41                           | 1.18                     |
| <b>500 nuclear families with 2 offspring each</b>               |                   |               |               |                               |                       |                       |                  |                                |                          |
| ...parents and one child genotyped                              | 25.0              | 94.7          | 1.0           | 0.05                          | 4.5                   | 27.3                  | 41.2             | 1.70                           | 1.14                     |

- see “relative efficiency calculation” section for description of Design A and Design B.
