# Supplementary material for: In silico method for inferring genotypes in pedigrees
Source: Springer Nature journal article supplement (doi:10.1038/ng1863), 2006-08-20
Supplement: 41588_2006_BFng1863_MOESM2_ESM.pdf [file 41588_2006_BFng1863_MOESM2_ESM.pdf]

# In Silico Genotyping: Determining Genotypes in Pedigrees by Inference

Joshua T. Burdick, Weimin Chen, Gonçalo R. Abecasis, Vivian G. Cheung

Supplementary Table 2. Summary of chi-squares in 1000 simulations.

|                                                  | # Families | H <sup>2</sup> | Average Chi-square |          |          |          | Median Chi-square |          |         |         |
|--------------------------------------------------|------------|----------------|--------------------|----------|----------|----------|-------------------|----------|---------|---------|
|                                                  |            |                | Original           | Inferred | Ratio A* | Ratio B* | Original          | Inferred | Ratio A | Ratio B |
| CEPH pedigrees in Table 1 of main manuscript     | 1          | 0.5            | NA                 | 40.79    |          |          | NA                | 40.17    |         |         |
| ...everyone genotyped                            | 1          | 0.5            | 49.85              | 49.85    |          |          | 49.23             | 49.23    |         |         |
| 3-generation pedigrees with 8 offspring each     |            |                |                    |          |          |          |                   |          |         |         |
| ...grandparents and parents genotyped            | 10         | 0.5            | NA                 | 35.80    |          |          | NA                | 35.09    |         |         |
| ...grandparents, parents and one child genotyped | 10         | 0.5            | NA                 | 44.07    |          |          | NA                | 43.65    |         |         |
| ...everyone genotyped                            | 10         | 0.5            | NA                 | 45.44    |          |          | NA                | 45.19    |         |         |
| 3-generation pedigrees with 8 offspring each     |            |                |                    |          |          |          |                   |          |         |         |
| ...grandparents and parents genotyped            | 100        | 0.05           | 6.43               | 28.56    | 4.44     | 1.77     | 5.38              | 27.61    | 5.13    | 1.78    |
| ...grandparents, parents and one child genotyped | 100        | 0.05           | 9.86               | 34.47    | 3.50     | 1.92     | 8.52              | 32.96    | 3.87    | 1.93    |
| ...everyone genotyped                            | 100        | 0.05           | 35.63              | 35.63    |          |          | 34.33             | 34.33    |         |         |
| ...everyone genotyped                            | 43         | 0.05           | 16.18              | 16.18    |          |          | 15.52             | 15.52    |         |         |
| ...everyone genotyped                            | 50         | 0.05           | 17.99              | 17.99    |          |          | 17.10             | 17.10    |         |         |
| Nuclear families with 3 offspring each           |            |                |                    |          |          |          |                   |          |         |         |
| ...parents and one child genotyped               | 500        | 0.05           | 14.14              | 33.12    | 2.34     | 1.35     | 13.41             | 32.19    | 2.40    | 1.37    |
| ...parents and two children genotyped            | 500        | 0.05           | 27.18              | 38.00    | 1.40     | 1.19     | 26.34             | 37.07    | 1.41    | 1.18    |
| ...everyone genotyped                            | 500        | 0.05           | 39.72              | 39.72    |          |          | 39.00             | 39.00    |         |         |
| ...everyone genotyped                            | 300        | 0.05           | 24.61              | 24.61    |          |          | 23.54             | 23.54    |         |         |
| ...everyone genotyped                            | 400        | 0.05           | 32.05              | 32.05    |          |          | 31.54             | 31.54    |         |         |
| Nuclear families with 2 offspring each           |            |                |                    |          |          |          |                   |          |         |         |
| ...parents and one child genotyped               | 500        | 0.05           | 14.00              | 23.35    | 1.67     | 1.12     | 13.41             | 22.80    | 1.70    | 1.14    |
| ...everyone genotyped                            | 500        | 0.05           | 27.10              | 27.10    |          |          | 26.33             | 26.33    |         |         |
| ...everyone genotyped                            | 375        | 0.05           | 20.93              | 20.93    |          |          | 19.94             | 19.94    |         |         |

\*Ratio A = relative efficiency versus "Design A"

\*Ratio B = relative efficiency versus "Design B"
